# Supplementary material for: Multiply to conquer: Copy number variations at Ppd-B1 and Vrn-A1 facilitate global adaptation in wheat
Source: PubMed Central journal article supplement (PMC4518651; doi:10.1186/s12863-015-0258-0), 2015-07-29
Supplement: 12863_2015_258_MOESM1_ESM.pdf [file 12863_2015_258_MOESM1_ESM.pdf]

# **Multiply to conquer: Copy number variations at *Ppd-B1* and *Vrn-A1* facilitate global adaptation in wheat**

**Tobias Würschum<sup>\*</sup>, Philipp H. G. Boeven, Simon M. Langer<sup>§</sup>, C. Friedrich H. Longin, Willmar L. Leiser**

State Plant Breeding Institute, University of Hohenheim, 70593 Stuttgart, Germany

<sup>\*</sup> Corresponding author

<sup>§</sup> Present address: Bayer CropScience Aktiengesellschaft, European Wheat Breeding Center, 06466 Gatersleben, Germany

## **Supplementary Information**

This file contains the Supplementary Tables and Figures.

**Table S1 Copy number variations at *Photoperiod-B1 (Ppd-B1)* and *Vernalization-A1 (Vrn-A1)* in winter wheat dependent on the country of origin.**

| Country | <i>n</i> | <i>Ppd-B1</i> copy number |     |    |    | <i>Vrn-A1</i> copy number |     |     |   |
|---------|----------|---------------------------|-----|----|----|---------------------------|-----|-----|---|
|         |          | 0                         | 1   | 2  | 3  | 1                         | 2   | 3   | 4 |
| AF      | 1        | -                         | 1   | -  | -  | 1                         | -   | -   | - |
| AU      | 1        | -                         | 1   | -  | -  | -                         | 1   | -   | - |
| AT      | 49       | -                         | 44  | 5  | -  | 1                         | 17  | 31  | - |
| BE      | 17       | -                         | 17  | -  | -  | 1                         | 14  | 2   | - |
| BG      | 9        | -                         | 7   | -  | 2  | -                         | 1   | 8   | - |
| CA      | 1        | -                         | 1   | -  | -  | -                         | -   | 1   | - |
| CH      | 15       | -                         | 15  | -  | -  | -                         | 11  | 4   | - |
| CN      | 46       | -                         | 15  | 5  | 26 | 13                        | 9   | 23  | 1 |
| CSK     | 12       | -                         | 11  | -  | 1  | -                         | 6   | 6   | - |
| DE      | 287      | -                         | 280 | 7  | -  | 4                         | 109 | 174 | - |
| DK      | 12       | -                         | 12  | -  | -  | -                         | 7   | 5   | - |
| ES      | 3        | -                         | 3   | -  | -  | -                         | 3   | -   | - |
| FI      | 5        | -                         | 5   | -  | -  | -                         | -   | 5   | - |
| FR      | 232      | -                         | 208 | 21 | 3  | 11                        | 179 | 42  | - |
| GB      | 121      | -                         | 119 | 1  | 1  | 20                        | 81  | 20  | - |
| HR      | 8        | -                         | 4   | 3  | 1  | 2                         | 3   | 2   | 1 |
| HU      | 7        | -                         | 7   | -  | -  | -                         | 1   | 6   | - |
| IT      | 25       | -                         | 19  | 1  | 5  | 8                         | 12  | 5   | - |
| KG      | 3        | -                         | 3   | -  | -  | -                         | 1   | 2   | - |
| LV      | 2        | -                         | 2   | -  | -  | -                         | -   | 2   | - |
| MX      | 2        | -                         | 2   | -  | -  | 1                         | -   | 1   | - |
| NL      | 25       | -                         | 22  | 3  | -  | 2                         | 11  | 12  | - |
| NO      | 1        | -                         | 1   | -  | -  | -                         | -   | 1   | - |
| NZ      | 2        | -                         | 2   | -  | -  | -                         | 2   | -   | - |
| PL      | 58       | 1                         | 52  | 5  | -  | 1                         | 20  | 37  | - |
| RO      | 5        | -                         | 4   | 1  | -  | -                         | -   | 5   | - |
| RU      | 16       | -                         | 11  | 4  | 1  | 1                         | 2   | 13  | - |
| RS      | 8        | -                         | 8   | -  | -  | 1                         | 4   | 3   | - |
| SUN     | 8        | -                         | 8   | -  | -  | 1                         | 1   | 5   | 1 |
| SE      | 39       | -                         | 39  | -  | -  | 1                         | 15  | 23  | - |
| TR      | 8        | -                         | 8   | -  | -  | -                         | 2   | 16  | - |
| UA      | 3        | -                         | 3   | -  | -  | -                         | -   | 3   | - |
| US      | 37       | -                         | 33  | 1  | 3  | 2                         | 10  | 25  | - |
| YUG     | 12       | -                         | 11  | -  | 1  | 4                         | 3   | 5   | - |

AF, Afghanistan; AU, Australia; AT, Austria; BE, Belgium; BG, Bulgaria; CA, Canada; CH, Switzerland; CN, China; CSK, former Czechoslovakia; DE, Germany (including 10 varieties from former Eastern Germany); DK, Denmark; ES, Spain; FI, Finland; FR, France; GB, Great Britain; HR, Croatia; HU, Hungary; IT, Italy; KG,

Kyrgyzstan; LV, Latvia; MX, Mexico; NL, The Netherlands; NO, Norway; NZ, New Zealand; PL, Poland; RO, Romania; RU, Russia; RS, Serbia; SUN, former Soviet Union; SE, Sweden; TR, Turkey; UA, Ukraine; US, United States of America; YUG, former Yugoslavia. For 30 varieties no information on the origin was available.

**Table S2 Effect of copy number variation *Vernalization-A1 (Vrn-A1)* on heading date (HD).**

| Genotypes | <i>n</i> | Mean HD of <i>Vrn-A1</i> copy number |             |             |             | <i>Vrn-A1</i>        |            |
|-----------|----------|--------------------------------------|-------------|-------------|-------------|----------------------|------------|
|           |          | 1                                    | 2           | 3           | 4           | <i>p<sub>G</sub></i> | CNV effect |
| All       | 1110     | 157.7 ± 7.2                          | 161.6 ± 4.7 | 160.9 ± 5.8 | 154.7 ± 5.1 | 0.2                  | 0.4        |
| EU        | 958      | 160.6 ± 4.8                          | 161.9 ± 4.3 | 162.3 ± 4.6 | 154.8       | 0.3                  | 0.4        |
| SE + DK   | 51       | 160.3                                | 168.2 ± 4.9 | 168.3 ± 4.3 | -           | 1.3                  | 0.9        |
| GB        | 121      | 163.2 ± 2.7                          | 163.3 ± 2.9 | 164.4 ± 4.3 | -           | 1.4                  | 0.6        |
| NL + BE   | 42       | 169.9 ± 3.0                          | 164.1 ± 3.4 | 164.1 ± 2.6 | -           | 9.0                  | -1.7       |
| DE        | 287      | 158.2 ± 4.6                          | 162.4 ± 2.7 | 163.0 ± 2.8 | -           | 2.2                  | 0.8        |
| PL        | 58       | 161.8                                | 163.7 ± 5.1 | 162.3 ± 4.7 | -           | 0.6                  | -0.7       |
| AT + CSK  | 61       | 155.0                                | 160.4 ± 4.2 | 160.1 ± 3.2 | -           | 1.1                  | 0.7        |
| FR        | 232      | 160.8 ± 3.9                          | 161.1 ± 4.0 | 161.5 ± 4.1 | -           | 0.2                  | 0.3        |
| IT        | 25       | 155.9 ± 3.3                          | 156.5 ± 4.7 | 158.7 ± 4.2 | -           | 0.6                  | 0.5        |
| YUG       | 28       | 156.0 ± 3.1                          | 153.8 ± 3.9 | 154.2 ± 2.4 | 154.8       | 0.8                  | -0.3       |
| US        | 37       | 153.6 ± 1.0                          | 156.9 ± 2.4 | 160.6 ± 4.8 | -           | 22.6                 | 3.6        |
| CN        | 46       | 145.9 ± 5.5                          | 148.2 ± 4.5 | 147.1 ± 2.7 | 149.6       | 1.0                  | 0.4        |

Proportion of explained genotypic variance (*p<sub>G</sub>* in %) and copy number variation (CNV) effect in different groups of genotypes. AT, Austria; BE, Belgium; CN, China; CSK, former Czechoslovakia; DE, Germany; DK, Denmark; EU, Europe; FR, France; GB, Great Britain; IT, Italy; NL, The Netherlands; PL, Poland; SE, Sweden; US, United States of America; YUG, former Yugoslavia, Serbia, Croatia.

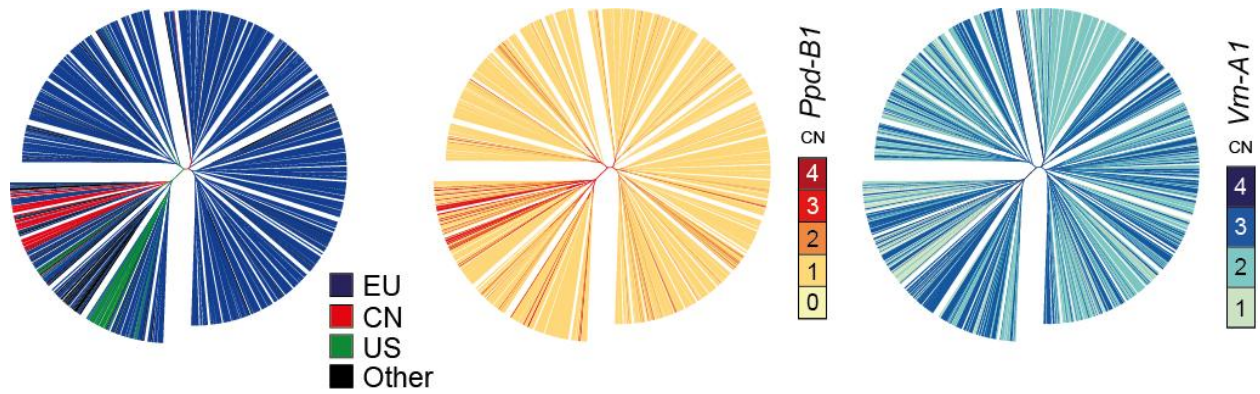

**Figure S1** Phylogenetic relationships among the 1,110 varieties from different origins and their copy number at the *Photoperiod-B1* (*Ppd-B1*) and *Vernalization-A1* (*Vrn-A1*) loci. EU, Europe; CN, China; US, United States of America.

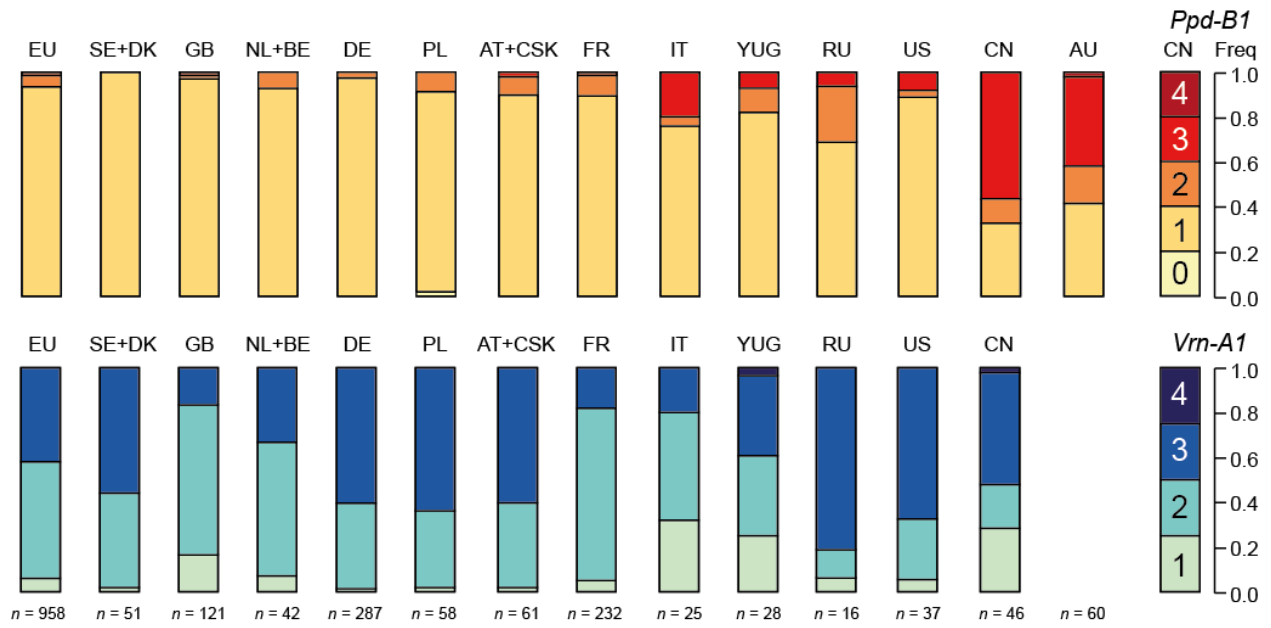

**Figure S2** Frequency of copy number variations at *Photoperiod-B1* (*Ppd-B1*) and *Vernalization-A1* (*Vrn-A1*) in different geographic regions.
